# Supplementary material for: Unexpected Inheritance: Multiple Integrations of Ancient Bornavirus and Ebolavirus/Marburgvirus Sequences in Vertebrate Genomes
Source: PLoS Pathog. 2010 Jul 29;6(7):e1001030. doi: 10.1371/journal.ppat.1001030 (PMC2912400; doi:10.1371/journal.ppat.1001030)
Supplement: Table S7 — List of Endogenous Midway/Nyamanini and Tamana bat virus like integrations (0.04 MB DOC) [file ppat.1001030.s007.doc]

***Table S7.*** List of endogenous Midway/Nyamanini and Tamana bat virus like integrations.

| Specie | Scaffold or Chromosome | Integrated protein | Location on scaffold or chromosome | Location within Ebola VP35 protein | BLAST E-value and percent identity | Label | Significant large ORFs (length and position) |
| --- | --- | --- | --- | --- | --- | --- | --- |
| Medaka (*Oryzias Latipes*) | scaffold1104 | NS3-like protein, Tamana Bat Virus | 27200-27769 | 271-464 | 2E-07 / 28% | olENS3 | 212aa (residues 313-526) 2) |
| Zebrafish (*Danio Rerio*) | chr7 | L-protein,  Midway Virus | 5403187-5404776 | 381-924 | 6E-025 / 23% | drEMLL-1 | 161aa (residues 405-568)  319aa (residues 659-980) 2) |
| chr20 | L-protein,  Midway Virus | 10806996-10809302 | 362-1142 | 5E-032 / 21% | drEMLL-2 | 590aa (residues 351-953) 2) |
| chr25 | L-protein,  Midway Virus | 23545949-23548084 | 238-962 | 8E-027 / 21% | drEMLL-3 | 761aa (residues TSS-756) 2)  180aa (residues 792-971) 2) |
| chr4 | L-protein,  Midway Virus | 66339375-66340469 | 231-593 | 9E-14 / 22% | drEMLL-4 |  |
| chr4 | L-protein,  Midway Virus | 42016876-42017517 | 475-697 | 7E-08 / 24% | drEMLL-5 |  |
| Zv8_scaffold3025 | L-protein,  Midway Virus | 269149-270384 | 541-968 | 3E-13 / 20% | drEMLL-6 |  |

1) Full protein length is 651 aminoacids fro L-protein of Midway virus, and 624 aminoacids for NS3 proteins of the Tamana Bat virus.

2) Open reading frames may extend beyond amino acid alignments by BLAST program. In this column we report extrapolated boundaries of open reading frames.
